# Supplementary material for: Pathogenic VCP/TER94 Alleles Are Dominant Actives and Contribute to Neurodegeneration by Altering Cellular ATP Level in a Drosophila IBMPFD Model
Source: PLOS journal article supplement (doi:10.1371/journal.pgen.1001288), 2011-02-03
Supplement: S6 (10.1371/journal.pgen.1001288.s006) [file journal.pgen.1001288.s006]

**Table S1**

Primer sets used in generating TER94 mutations

| Constructs | Primer set |
| --- | --- |
| pUAST-TER94R152H | forward: 5’-ACAACTTTATTGTGCAC*GCCGCCATG-CGTCC-3’ |
| reverse: 5’-GGACGCATGGCGGCGTGCACAATAAA-GTTGT-3’ |
| pUAST-TER94R188Q | forward: 5’-CGGTGATCCAATTAAGCAAGAGGAGG-AGGAGGAGTCCC-3’ |
| reverse: 5’-GGGACTCCTCCTCCTCCTCTTGCTTA-ATTGGATCACCG-3’ |
| pUAST-TER94A229E | forward: 5’-CCATCGCTCTTCAAGGAAATTGGTGTG-AAGCCA-3’ |
| reverse: 5’-TGGCTTCACACCAATTTCCTTGAAGAG-CGATGG-3’ |
| pUAST-TER94K248A | forward: 5’-CGGTCCCCCGGGTACCGGTGCGACC-CTGATTGCCAGGGC-3’ |
| reverse: 5’-gccctggcaatcagggtcgcaccgg-tacccgggggaccg-3’ |
| pUAST-TER94K521A | forward: 5’-CCCCCTGGTTGCGGTGCGACGCTGC-TGGCCAAGGCC-3’ |
| reverse: 5’-ggccttggccagcagcgtcgcaccg-caaccaggggg-3’ |
| pUAST-TER94E302Q | forward: 5’-GGCTATCATCTTCATCGATCAGATCG-ACGCTATTGCCCC-3’ |
| reverse: 5’-GGGGCAATAGCGTCGATCTGATCGAT-GAAGATGATAGCC-3’ |
| pUAST-TER94E575Q | forward: 5’-GTGCTCTTCTTCGACCAGCTGGACTC-GATCGCC-3’ |
| reverse: 5’-GGCGATCGAGTCCAGCTGGTCGAAGA-AGAGCAC-3’ |
| pUAST-TER94R356E,R359E | forward: 5’-CCCGGCCCTGCGTGAGTTTGGAGAG-TTTGATCGTGAG-3’ |
| reverse: 5’-ctcacgatcaaactctccaaactca-cgcagggccggg-3’ |

*Underline indicates the changed codon.
